# Supplementary material for: Chronic Exposure to Dim Light at Night or Irregular Lighting Conditions Impact Circadian Behavior, Motor Coordination, and Neuronal Morphology
Source: PubMed Central journal article supplement (PMC9043330; doi:10.3389/fnins.2022.855154), 2022-04-13
Supplement: Data_Sheet_1.pdf [file Data_Sheet_1.pdf]

*Supplementary Material*

**Supplementary Table 1.** Summary of wheel running parameters under 12:12LD, DD and LL for all three chronic lighting treatment groups.

|                                      | 12:12LD              |                     |                      | DD                  |                     |                     | LL                  |                     |                     |
|--------------------------------------|----------------------|---------------------|----------------------|---------------------|---------------------|---------------------|---------------------|---------------------|---------------------|
|                                      | LD                   | DLAN                | SJ                   | LD                  | DLAN                | SJ                  | LD                  | DLAN                | SJ                  |
|                                      | (n=8)                | (n=12)              | (n=11)               | (n=8)               | (n=12)              | (n=9)               | (n=7)               | (n=12)              | (n=10)              |
| Period (h)                           | 24.0 ± 0.00          | 24.0 ± 0.00         | 24.0 ± 0.00          | 23.88 ± 0.06        | 23.86 ± 0.03        | 23.89 ± 0.06        | 24.95 ± 0.47        | 25.25 ± 0.11        | 25.13 ± 0.22        |
| Alpha (h)                            | 11.63 ± 0.25         | 11.58 ± 0.17        | 11.6 ± 0.14          | 11.76 ± 0.30        | 11.63 ± 0.48        | 12.33 ± 0.41        | 6.12 ± 1.42         | 6.26 ± 0.44         | 6.58 ± 0.83         |
| (Subjective) day activity (counts)   | <b>458.6 ± 147.1</b> | <b>1050 ± 173.5</b> | <b>445.3 ± 72.62</b> | <b>1142 ± 205.4</b> | <b>2423 ± 360.7</b> | <b>1380 ± 194.9</b> | 344.4 ± 142.3       | 480.3 ± 81.60       | 746.8 ± 355.8       |
| (Subjective) night activity (counts) | 7937 ± 2642          | 16534 ± 2230        | 12100 ± 2690         | <b>8251 ± 3134</b>  | <b>18190 ± 3649</b> | <b>19123 ± 2400</b> | <b>1425 ± 410.4</b> | <b>3851 ± 453.9</b> | <b>2289 ± 703.9</b> |
| Total activity (counts)              | 8395 ± 2734          | 17584 ± 2241        | 12545 ± 2693         | <b>9393 ± 3305</b>  | <b>20614 ± 3729</b> | <b>10502 ± 2393</b> | <b>1770 ± 531.9</b> | <b>4332 ± 502.1</b> | <b>3036 ± 961.3</b> |
| (Subjective) day activity (%)        | 6.96 ± 1.54          | 7.06 ± 1.34         | 5.75 ± 1.63          | 18.01 ± 2.58        | 14.18 ± 2.13        | 18.67 ± 3.28        | 16.47 ± 4.25        | 11.24 ± 1.76        | 21.78 ± 4.35        |
| Intradaily variability               | <b>1.24 ± 0.10</b>   | <b>0.85 ± 0.08</b>  | <b>0.99 ± 0.11</b>   | <b>1.32 ± 0.15</b>  | <b>0.90 ± 0.11</b>  | <b>1.39 ± 0.12</b>  | 1.57 ± 0.11         | 1.23 ± 0.10         | 1.63 ± 0.16         |

|                               |                      |                      |                      |                      |                      |                      |                     |                     |                     |
|-------------------------------|----------------------|----------------------|----------------------|----------------------|----------------------|----------------------|---------------------|---------------------|---------------------|
| Relative amplitude            | 0.99 ± 0.00          | 0.99 ± 0.00          | 0.99 ± 0.01          | <b>0.97 ± 0.01</b>   | <b>0.99 ± 0.00</b>   | <b>0.95 ± 0.02</b>   | <b>0.90 ± 0.06</b>  | <b>0.96 ± 0.03</b>  | <b>0.87 ± 0.03</b>  |
| Interdaily stability          | 0.70 ± 0.03          | 0.74 ± 0.03          | 0.71 ± 0.05          | N/A                  | N/A                  | N/A                  | N/A                 | N/A                 | N/A                 |
| Number of bouts               | 52.75 ± 3.77         | 42.00 ± 4.073        | 51.27 ± 4.478        | 54.13 ± 5.09         | 40.33 ± 4.94         | 57.11 ± 5.65         | 28.43 ± 1.875       | 31.33 ± 1.33        | 34.10 ± 1.97        |
| Average bout length (minutes) | <b>49.96 ± 12.06</b> | <b>111.9 ± 14.62</b> | <b>75.57 ± 14.97</b> | <b>53.79 ± 17.00</b> | <b>112.7 ± 20.00</b> | <b>54.19 ± 12.55</b> | <b>73.78 ± 5.79</b> | <b>96.31 ± 5.79</b> | <b>70.47 ± 6.17</b> |
| Average counts per bout       | <b>1564 ± 636</b>    | <b>4673 ± 796</b>    | <b>3070 ± 984</b>    | <b>2216 ± 1046</b>   | <b>5637 ± 1271</b>   | <b>2055 ± 647</b>    | <b>582 ± 215</b>    | <b>1307 ± 174</b>   | <b>781 ± 244</b>    |
| Average peak rate             | <b>57.10 ± 7.85</b>  | <b>79.98 ± 3.05</b>  | <b>67.53 ± 4.52</b>  | 62.70 ± 7.70         | 89.27 ± 9.16         | 67.35 ± 5.68         | 44.47 ± 6.52        | 57.05 ± 3.49        | 48.76 ± 5.70        |

**Notes:** After 1 year of ageing in either: 12 h of light, 12 h of dark (LD), dim light at night (DLAN) or a social jetlag protocol (SJ), wheel running patterns were analyzed in all mice under three different lighting conditions: 12 h of light, 12 h of dark (12:12LD), constant dark (DD) and constant light (LL). Values represent mean ± SEM. N/A denotes parameters that cannot be assessed in constant conditions (DD and LL). Values that are bold/italic represent a significant group difference for a given lighting condition (12:12LD, DD, or LL) on wheel running parameters.

**Supplementary Table 2.** Summary of passive infrared monitoring parameters under 12:12LD and DD for all three chronic lighting treatment groups.

|                                         | 12:12LD            |                    |                    | DD                  |                     |                     |
|-----------------------------------------|--------------------|--------------------|--------------------|---------------------|---------------------|---------------------|
|                                         | LD (n=6)           | DLAN (n=12)        | SJ (n=10)          | LD (n=10)           | DLAN (n=12)         | SJ (n=10)           |
| Period (h)                              | 24.0 ± 0.00        | 24.0 ± 0.00        | 24.0 ± 0.00        | <b>23.87 ± 0.02</b> | <b>23.78 ± 0.02</b> | <b>23.86 ± 0.02</b> |
| Alpha (h)                               | 12.04 ± 0.06       | 11.87 ± 0.14       | 11.89 ± 0.16       | 12.7 ± 0.19         | 12.75 ± 0.17        | 12.44 ± 0.11        |
| (Subjective) day activity (counts)      | 2389 ± 274         | 2640 ± 143         | 2782 ± 234         | <b>2629 ± 201</b>   | <b>3029 ± 267</b>   | <b>3609 ± 256</b>   |
| (Subjective) night activity<br>(counts) | 9786 ± 642         | 9987 ± 567         | 9777 ± 672         | 10032 ± 590         | 11047 ± 688         | 10770 ± 790         |
| Total activity (counts)                 | 12175 ± 898        | 12627 ± 628        | 12559 ± 888        | 12662 ± 682         | 14077 ± 841         | 14380 ± 1021        |
| (Subjective) day activity (%)           | 19.37 ± 0.86       | 21.25 ± 1.21       | 22.06 ± 0.63       | <b>20.84 ± 1.22</b> | <b>21.6 ± 1.37</b>  | <b>25.2 ± 0.69</b>  |
| Intradaily variability                  | <b>1.31 ± 0.06</b> | <b>1.21 ± 0.03</b> | <b>1.41 ± 0.06</b> | 1.35 ± 0.06         | 1.25 ± 0.04         | 1.39 ± 0.04         |
| Relative amplitude                      | 0.72 ± 0.02        | 0.69 ± 0.02        | 0.66 ± 0.01        | <b>0.73 ± 0.02</b>  | <b>0.71 ± 0.03</b>  | <b>0.64 ± 0.02</b>  |

|                               |                   |                   |                    |                   |                  |                  |
|-------------------------------|-------------------|-------------------|--------------------|-------------------|------------------|------------------|
| Interdaily stability          | $0.57 \pm 0.02$   | $0.58 \pm 0.02$   | $0.51 \pm 0.02$    | N/A               | N/A              | N/A              |
| Number of bouts               | $45.64 \pm 0.87$  | $46.93 \pm 1.55$  | $47.01 \pm 1.35$   | $47.13 \pm 1.47$  | $48.47 \pm 1.38$ | $51.89 \pm 1.78$ |
| Average bout length (minutes) | $14.35 \pm 0.6$   | $14.11 \pm 0.44$  | $14.62 \pm 0.59$   | $14.38 \pm 0.39$  | $14.27 \pm 0.51$ | $14.73 \pm 0.78$ |
| Average counts per bout       | $264.62 \pm 17.9$ | $271.33 \pm 17.4$ | $268.175 \pm 23.8$ | $270.6 \pm 16.14$ | $292.5 \pm 17.2$ | $280.8 \pm 24.7$ |
| Average peak rate             | $24.41 \pm 1.23$  | $25.17 \pm 1.04$  | $25.57 \pm 0.67$   | $24.46 \pm 0.75$  | $24.35 \pm 0.51$ | $25.09 \pm 0.77$ |

---

**Notes:** After 1 year of ageing in either: 12 h of light, 12 h of dark (LD), dim light at night (DLAN) or a social jetlag protocol (SJ), passive infrared activity patterns were analyzed in all mice under two different lighting conditions: 12 h of light, 12 h of dark (12:12LD) and constant dark (DD). Values represent mean  $\pm$  SEM. N/A denotes parameters that cannot be assessed in constant conditions (DD). Values that are bold/italic represent a significant group difference for a given lighting condition (12:12LD or DD) on passive infrared activity parameters.

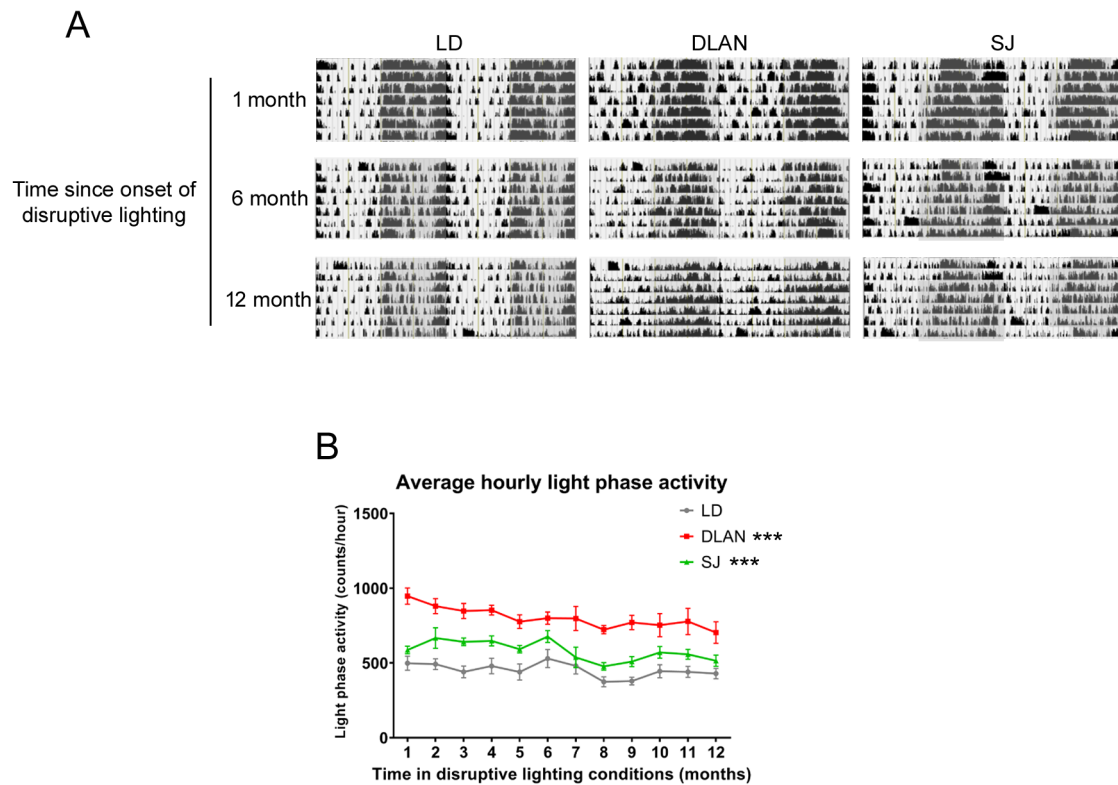

**Supplementary Fig. 1.** Activity of group housed animals during disruption period. (A) Representative double-plotted actograms of group housed animals, at 1 month, 6 months and 12 months following the onset of disruptive lighting. Actograms represent 7 days of recording. Periods of darkness or dim light are represented in grey. (B) Average counts per hour in the light phase for group housed cages in different lighting conditions.

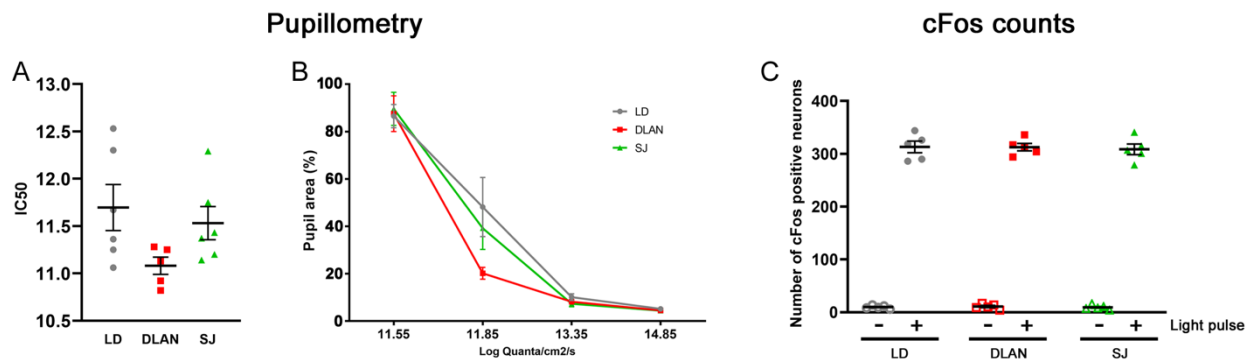

**Supplementary Fig. 2.** Analysis of light input pathways, following the end of the 12-month lighting disruption period. **(A-B)** Pupillary light reflex measured by dark-adapted pupillometry: rate of constriction **(A)** and pupil constriction across different light intensities **(B)** for mice from disruptive conditions (see Fig. 1 for a description of the three groups). **(C)** Light-induced cFos expression in the suprachiasmatic nucleus (cell counts of immuno-labelled cells). One-way ANOVA (with Welch correction, or Kruskal-Wallis test when appropriate), groups: LD, DLAN, SJ. Post-hoc tests conducted with Benjamini-Hochberg corrections when appropriate. All n.s.

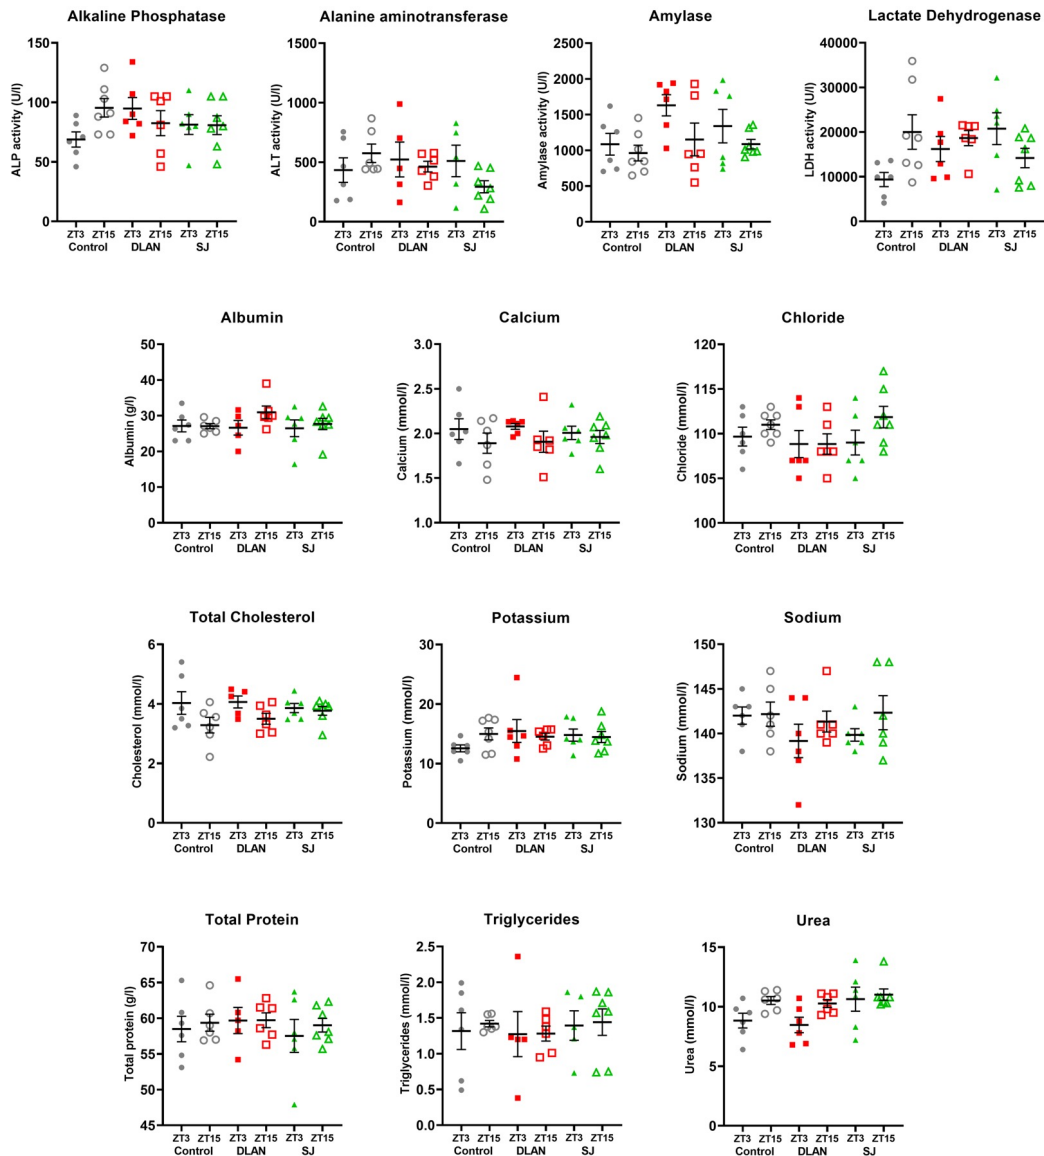

**Supplementary Fig. 3.** Clinical chemistry measures in the serum of mice from disruptive conditions, following the end of the 12-month lighting disruption period, at Zeitgeber (ZT) 3 and 15. Measures include activity levels of alkaline phosphatase, alanine aminotransferase, amylase or lactate dehydrogenase, and levels of albumin, calcium, chloride, cholesterol, potassium, sodium, protein, triglycerides or urea. One-way ANOVA (with Welch correction, or Kruskal-Wallis test when appropriate), groups: LD, DLAN, SJ. Post-hoc tests conducted with Benjamini-Hochberg corrections when appropriate. All n.s.
